# Supplementary material for: Clinical use of computational modeling for surgical planning of arteriovenous fistula for hemodialysis
Source: Springer Nature journal article supplement (doi:10.1186/s12911-017-0420-x), 2017-03-13

**Patient ID:** 014

**Fistula type:** Lower RC side-to-side

**Brachial Flow (mL/min)**

**-1 (pre-operative)**

**0      10 days      20 days      30 days      40 days**

51      437      620      680      716      746      2A-BRACHIAL\_MIDDLE

38      418      603      663      699      729      3A-BRACHIAL\_LOWER

**Radial Flow (mL/min)**

**-1 (pre-operative)**

**0      10 days      20 days      30 days      40 days**

22      418      603      663      699      729      5A-RADIAL DISTAL

**Cephalic Flow (mL/min)**

**-1 (pre-operative)**

**0      10 days      20 days      30 days      40 days**

-      387      572      632      669      698      8V-CEPHALIC LOWER DIST

**Radial Diameter (mm)**

**-1 (pre-operative)**

**0      10 days      20 days      30 days      40 days**

3.10      3.14      3.84      4.39      4.63      4.78      5A-RADIAL DISTAL

**Cephalic Diameter (mm)**

**-1 (pre-operative)**

**0      10 days      20 days      30 days      40 days**

-      2.53      4.30      4.90      5.29      5.57      8V-CEPHALIC LOWER DIST

## Flows

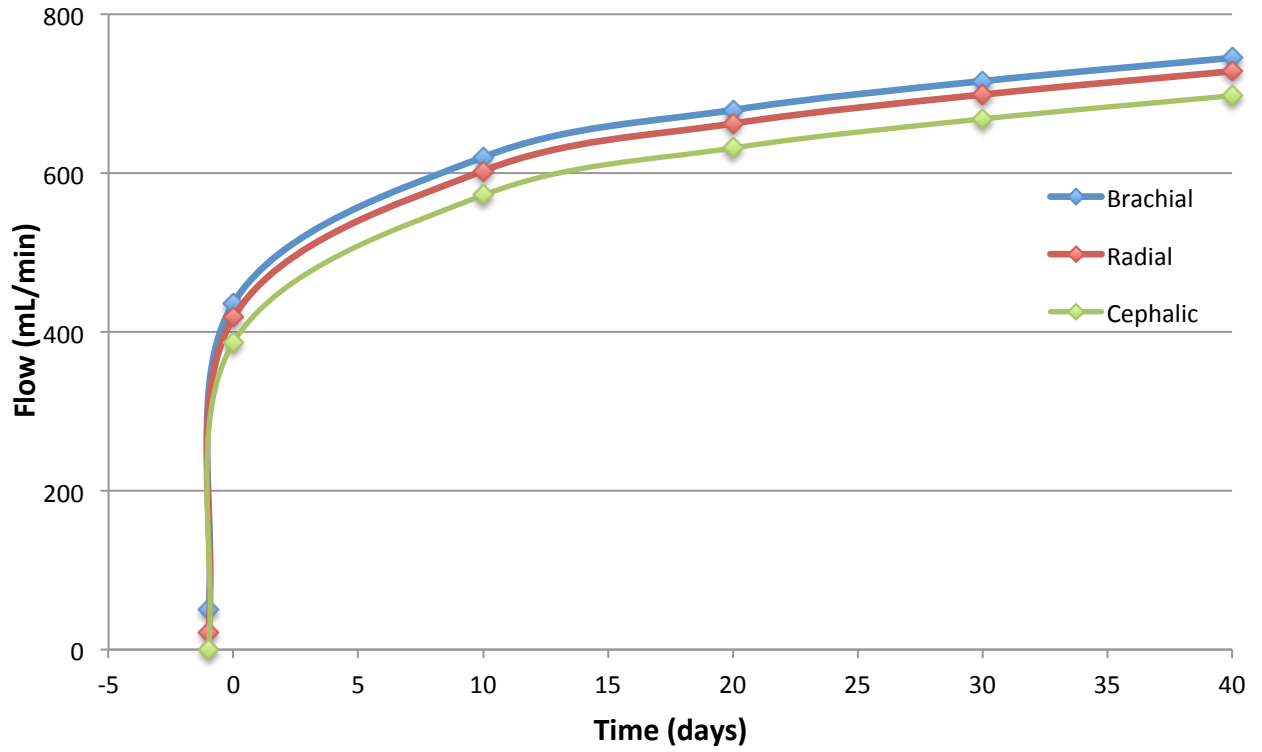

## Diameters

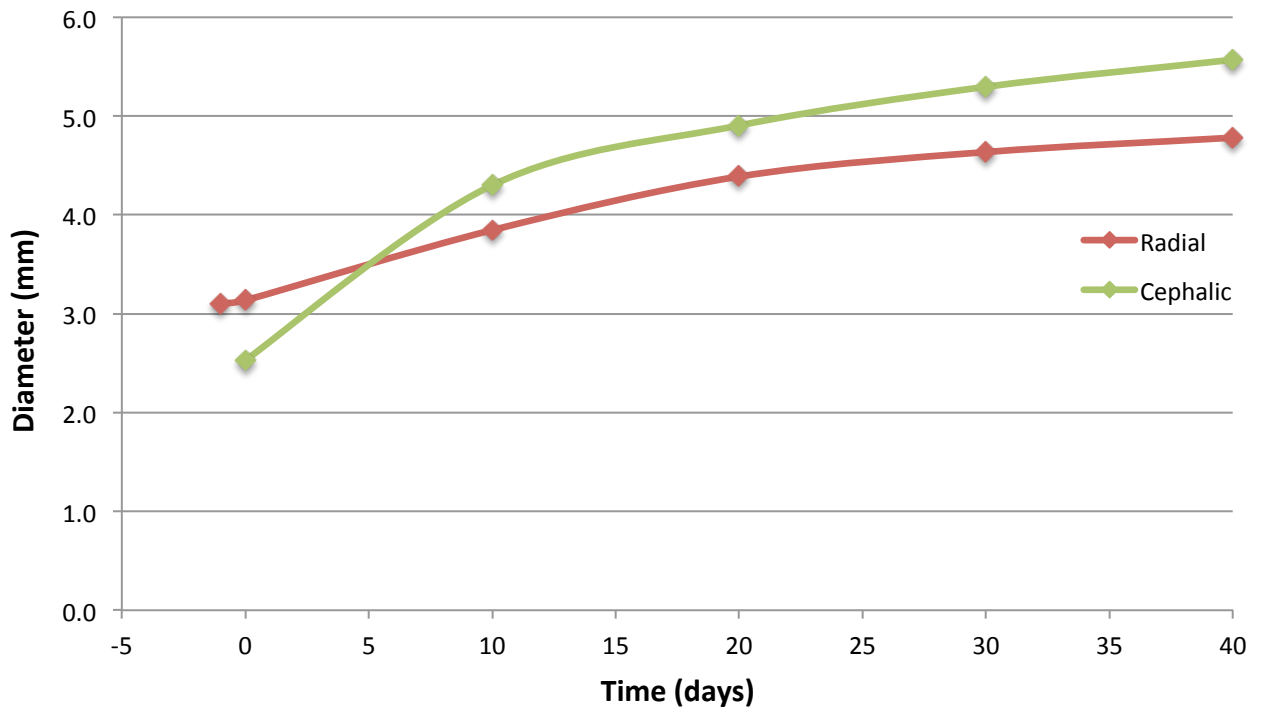

Supplement: MOESM1 [file 12138938]
